# Supplementary material for: Determination of lipid requirements in black soldier fly through semi-purified diets
Source: PubMed Central journal article supplement (PMC9239991; doi:10.1038/s41598-022-14290-y), 2022-06-28
Supplement: 41598_2022_14290_MOESM1_ESM.pdf [file 41598_2022_14290_MOESM1_ESM.pdf]

## Determination of lipid requirements in black soldier fly through semi-purified diets

S. Bellezza Oddon<sup>a</sup>, I. Biasato<sup>a\*</sup>, A. Resconi<sup>a</sup>, L. Gasco<sup>a</sup>

<sup>a</sup>Department of Agricultural, Forest and Food Sciences, University of Turin, Italy

\* Corresponding author: [ilaria.biasato@unito.it](mailto:ilaria.biasato@unito.it)

E-mail addresses: [sara.bellezzaoddon@unito.it](mailto:sara.bellezzaoddon@unito.it); [laura.gasco@unito.it](mailto:laura.gasco@unito.it);  
[andrea.resconi@unito.it](mailto:andrea.resconi@unito.it); [ilaria.biasato@unito.it](mailto:ilaria.biasato@unito.it)

### Supplementary Information

#### Gainesville diet

Data regarding the larva, prepupa, pupa and adult parameters recorded on the GA are shown in Table 1, while in Table 2 is illustrated the larvae chemical composition.

*Table 1. Effect of the environmental control on BSF life history traits. L-Pp larva-prepupa, L-P larva-pupa, WR weight reduction, FLW fly live weight, PW puparium weight, P-F pupa-fly, FLS fly lifespan, ER emergence rate, SR sex ratio.*

| Larvae (day old)    | Weight (g) |
|---------------------|------------|
| 6                   | 0.088      |
| 10                  | 0.099      |
| 14                  | 0.156      |
| 18                  | 0.183      |
| Survival rate (%)   | 96         |
| <b>Prepupae</b>     |            |
| Weight (g)          | 0.165      |
| L-Pp duration (day) | 8.0        |
| <b>Pupae</b>        |            |
| Weight (g)          | 0.149      |
| L-P duration (day)  | 13.62      |
| <b>Adult</b>        |            |
| WR (%)              | 35.68      |
| FLW (g)             | 0.097      |
| PW (g)              | 0.188      |
| P-F duration (day)  | 7.35       |
| FLS (day)           | 7.22       |

|        |       |
|--------|-------|
| ER (%) | 97.66 |
| SR     | 0.92  |

---

*Table 2. Chemical composition (on DM) of the larvae reared on GA. DM: dry matter, CP crude protein, EE ether extract, GE gross energy.*

<sup>a</sup>Values are reported as mean of duplicate analyses

| <b>Items</b> | <b>Larvae (% on DM)</b> |
|--------------|-------------------------|
| DM           | 22.83                   |
| CP           | 54.26                   |
| EE           | 13.58                   |
| Ash          | 10.88                   |
| GE           | 22.25                   |

---
